# Supplementary material for: pH-Independent lead sequestration and light management enable sustainable and efficient perovskite photovoltaics
Source: Royal Society of Chemistry journal article supplement (doi:10.1039/d4ee03820g), 2025-01-01
Supplement: d4ee03820g1.pdf [file d4ee03820g1.pdf]

## Supporting Information

# pH-independent lead sequestration and light management enable sustainable and efficient perovskite photovoltaics

Xi Jin, ‡<sup>abc</sup> Jun Li, ‡<sup>a</sup> Siyuan Zhu, <sup>cd</sup> Wenyan Tan, <sup>bc</sup> Jiahong Tang, <sup>a</sup> Xueyuan Gong, <sup>e</sup> Xingyu Liu, <sup>a</sup> Yu Zhang, <sup>bc</sup> Chao Zhou, <sup>c</sup> Zhaoheng Tang, <sup>c</sup> Vincent O. Nyamori, <sup>f</sup> Bice S. Martincigh, <sup>f</sup> Matthew L. Davies, <sup>fg</sup> Minghua Li, <sup>ch</sup> Tongsheng Chen, <sup>b</sup> Qi Chen, <sup>a</sup> Jinsong Hu, <sup>e</sup> Qijie Liang, <sup>\*c</sup> Weiqiang Chen <sup>\*b</sup> and Yan Jiang <sup>\*a</sup>

a X. Jin, J. Li, J. Tang, X. Liu, Q. Chen, Y. Jiang  
School of Materials Science and Engineering  
Beijing Institute of Technology  
Beijing 100081 (China)  
E-mail: yan.jiang@bit.edu.cn

b X. Jin, W. Tan, Y. Zhang, T. Chen, W. Chen  
MOE Key Laboratory of Laser Life Science & Guangdong Provincial Key Laboratory of Laser Life Science, Guangzhou Key Laboratory of Spectral Analysis and Functional Probes, College of Biophotonics  
South China Normal University  
Guangzhou 510631 (China)  
E-mail: achenweiqiang@m.senu.edu.cn

c X. Jin, S. Zhu, W. Tan, Y. Zhang, C. Zhou, Z. Tang, Q. Liang  
Songshan Lake Materials Laboratory  
Beijing Institute of Technology  
Dongguan 523429 (China)  
E-mail: liangqijie@sslslab.org.cn

d S. Zhu  
Department of Physics  
Liaoning University  
Shenyang 110036 (China)

e X. Gong, M. Li, J. Hu  
Beijing National Laboratory for Molecular Sciences (BNLMS), Institute of Chemistry  
Chinese Academy of Sciences,  
Beijing 100190 (China)

f V. Nyamori, B. Martincigh, M. Davies  
School of Chemistry and Physics  
University of KwaZulu-Natal  
Private Bag X54001, Durban, 4000 (South Africa)

g M. Davies  
SPECIFIC IKC, Materials Science and Engineering, Faculty of Science and Engineering  
Swansea University  
Singleton Park, Swansea, Wales SA2 8PP (UK)

h M. Li  
College of Chemical Engineering Beijing Advanced Innovation Center for Soft Matter Science and Engineering  
Beijing University of Chemical Technology  
Beijing 100029 (China)

\* Corresponding author

- 1 This file includes:
- 2 1. Experimental section
- 3 2. Figure S1 to S24.
- 4 3. Table S1 to S3.
- 5 4. References.

6

## 7 1. Experimental section

### 8 Materials

9 Pre-patterned ITO glass substrates were purchased from Advanced Election Technology CO. Ltd. N, N-dimethylformamide (DMF),  
10 dimethyl sulfoxide (DMSO), isopropanol (IPA), acetonitrile (ACN), chlorobenzene (CB), 4-tert-butylpyridine (tBP), cesium iodide  
11 (CsI), potassium iodide (KI), bis(trifluoromethane)sulfonimide lithium salt (Li-TFSI) and MoO<sub>x</sub> were purchased from Sigma-Aldrich.  
12 Formamidinium iodide (FAI), methylammonium chloride (MACl), and methylammonium bromide (MABr) were purchased from  
13 Greatcell Solar. Lead iodide (PbI<sub>2</sub>) was purchased from TCI. Spiro-MeOTAD, 2-phenylethylamine hydroiodide (PEAI) were  
14 purchased from Xi'an Polymer Light Technology. Tin (IV) oxide (SnO<sub>2</sub>) colloidal solution (15% in H<sub>2</sub>O) was purchased from Alfa  
15 Aesar. Poly (vinyl alcohol) (PVA) (degree of alcoholysis: 98.0–99.0 mol%, viscosity: 54.0-66.0 mPa.s), Concentrated Phosphoric acid  
16 (H<sub>3</sub>PO<sub>4</sub>) (≥85 wt.% in H<sub>2</sub>O), Urea, Potassium phosphate dibasic anhydrous (K<sub>2</sub>HPO<sub>4</sub>), and Glycerol (C<sub>3</sub>H<sub>8</sub>O<sub>3</sub>) were purchased from  
17 Aladdin. Besides, High-purity Ag electrode material was purchased from commercial sources.

### 18 Precursor Preparation.

19 The precursor of SnO<sub>2</sub> electron transporting layer was prepared by mixing SnO<sub>2</sub> colloidal solution with deionized water by a volume  
20 ratio of 1:3. The PbI<sub>2</sub> solution was obtained by dissolving 0.13 M CsI, 0.025 M KI and 1.3 M PbI<sub>2</sub> in mixed anhydrous solvent  
21 (DMF:DMSO is 19:1). The FAI solution was prepared by dissolving 60 mg of FAI, 6 mg of MABr and 6 mg of MACl in 1 ml IPA.  
22 The PEA solution (20 mM) was obtained by dissolving 5 mg PEA powder in 1 mL IPA. 72.3 mg of Spiro-MeOTAD, 28.5 μL of tBP  
23 and 17.5 μL of Li-TFSI (520 mg/mL in acetonitrile) were mixed in 1 mL CB to prepare the Spiro-OMeTAD solution. All of the above  
24 solutions were filtered by 0.22 μm filters before use. 2PACz solution was prepared by dissolving 1.5 mg 2PACz in 5 mL of ethanol  
25 solution. (Cs<sub>0.15</sub>FA<sub>0.85</sub>)Pb(I<sub>0.95</sub>Br<sub>0.05</sub>)<sub>3</sub> was obtained by dissolving 0.6579 g of FAI, 0.1437 g of CsBr and 2.0745 g of PbI<sub>2</sub> in 3 mL of  
26 an organic mixture (DMF: DMSO = 4:1, v/v).

### 27 Device Fabrication.

28 *The PSCs fabrication:* Pre-patterned ITO glass substrates were cleaned with anhydrous alcohol and acetone using an ultrasonic cleaner.  
29 Then, the substrates were dealt with ultraviolet ozone for 30 min. To prepare SnO<sub>2</sub> thin film, 100 μL SnO<sub>2</sub> nanocrystal colloidal  
30 solution was spin-coated onto the cleaned ITO substrate at 4000 rpm for 30 s, followed by drying at 150 °C for 30 min in ambient air.  
31 The films were cooled down and dealt with ultraviolet ozone for 30 min. PbI<sub>2</sub> solution was spin-coated at a rate of 1500 rpm for 30s,  
32 followed by thermal annealing at 70 °C for 1 min in nitrogen. Then the FAI solution was spin-coated onto PbI<sub>2</sub> at a rate of 1500 rpm  
33 for 30s, followed by thermal annealing at 150 °C for 15 min in ambient air (30-50% humidity). After the as-prepared perovskite  
34 substrates cooled down, 50 μL PEA solution was spin-coated onto perovskite films at 5000 rpm for 30 s in an N<sub>2</sub> glove box. Then 50  
35 μL the spiro-OMeTAD solution was deposited on the as-prepared perovskite substrates with a rate of 3000 rpm for 30 s and  
36 the films were stored in a drying cabinet (25 °C, RH 5-10%) overnight. Finally, 10 nm MoO<sub>3</sub> and 60 nm Ag were deposited by thermal  
37 evaporation under a high vacuum condition (<10<sup>-5</sup> Pa). The illumination area of the device was 0.09 cm<sup>2</sup> controlled by a metal mask.

38 *The F-PSCs fabrication:* Pre-patterned ITO PEN substrates were cleaned with deionized water and anhydrous alcohol. Then, the  
39 substrates were dealt with ultraviolet ozone for 30 min. To prepare 2PACz thin film, 100 μL 2PACz solution was spin-coated onto the  
40 cleaned PEN substrate at 3000 rpm for 30 s, followed by drying at 100 °C for 5 min in ambient air. The films were cooled down and  
41 dealt with ultraviolet ozone for 30 min. Perovskite precursor solution was spin-coated at a rate of 6000 rpm for 30s, at the 15th second,  
42 200 μL of CB was added dropwise and at the end of spin-coating, followed by thermal annealing at 150 °C for 20 min in nitrogen.  
43 Finally, 20 nm C<sub>60</sub>, 8 nm BCP and 100 nm Ag were deposited by thermal evaporation under a high vacuum condition, respectively.  
44 The illumination area of the device was 0.09 cm<sup>2</sup> controlled by a metal mask.

45 *PSMs fabrication:* The structure of PSMs is consistent with rigid PSCs. The PSMs were fabricated on 5 cm × 5 cm substrates with six  
46 sub-cells connected in series. A P1 line (90 μm width) was laser scribed to isolated ITO substrates. A P2 line (105 μm width) was laser  
47 etched after deposition of the ETL, perovskite layer and HTL. Finally, a P3 line (100 μm width) was mechanically scribed after the  
48 deposition of an 80-nm-thick copper electrode.

49 *Device encapsulation:* The perovskite devices were encapsulated by a 1-mm-thick cover glass using ultraviolet-curable resin (UV  
50 resin).

### 51 PPF Synthesis.

52 The H<sub>3</sub>PO<sub>4</sub> solution was prepared by mixing concentrated H<sub>3</sub>PO<sub>4</sub> solutions with deionized water by a volume ratio of 1:38. The  
53 K<sub>2</sub>HPO<sub>4</sub> solution (0.344 M) was obtained by dissolving 60 mg K<sub>2</sub>HPO<sub>4</sub> powder in 1 mL DI water. First, the PVA solution was obtained  
54 by adding 0.5 g PVA to 20 mL of deionized water, and magnetic stirred reaction for 2 h at 90 °C until completely dissolved. Then,

1 200  $\mu\text{L}$  the  $\text{H}_3\text{PO}_4$  solution was added to the PVA solution, stirred and heated for 1 h. To prepare PVA/PoB, 1 mL  $\text{K}_2\text{HPO}_4$  solution  
2 was added to the mixed solution of PVA and  $\text{H}_3\text{PO}_4$ , and kept stirring and heating for 1 h. The PFPF was obtained by adding 0.5 mL  
3  $\text{C}_3\text{H}_8\text{O}_3$  to the PVA/PoB solution and stirring for 1 h. The product was cooled down to room temperature and dried for 24-72 h until  
4 the film solidified. The PFPF was obtained by pouring the PFPF solution into a petri dish containing a silicon wafer. The product was  
5 cooled down to room temperature and dried for 24-72 h until the film solidified. After the PFPF is cured, it is removed from the wafer.  
6 The non-textured side of PFPF was attached to the substrate of rigid or flexible PSCs.

#### 7 **Characterization.**

8 The  $J$ - $V$  characteristics of photovoltaic devices were measured with a solar simulator (Newport) under AM 1.5 G standard irradiation  
9 ( $1000 \text{ W/m}^2$ ) in a nitrogen atmosphere ( $25 \text{ }^\circ\text{C}$ ), and Keithley 2400 source meter. Intensity of the solar simulator was calibrated using  
10 a certified monocrystalline silicon solar cell (KG5). The active areas of devices are  $0.09 \text{ cm}^2$ , which are defined by metal masks. XPS  
11 characterizations were performed by using Thermo Fisher ESCALAB Xi+ (Al  $K\alpha$  source), and core level C 1s (C-C bond of 284.8 eV)  
12 was used as the reference to calibrate the energy position. FTIR was operated by using Bruker INVENIO-R. XRD patterns were  
13 measured by using Bruker D8 Advance X-ray diffractometer (Cu  $K\alpha$  radiation). FE-SEM images were obtained by Zeiss Gemini SEM  
14 300. The IPCE spectra were tested by QE-R3-011 measurement system from EnLi Technology. The  $\text{Pb}^{2+}$  concentrations were tested  
15 by using the Inductively coupled Plasma-Mass Spectrometry (Agilent 7800) and Inductively Coupled Plasma-Optical Emission  
16 Spectrometer (iCAP 7200).

#### 17 **Lead sequestration tests.**

18 All glassware used in the lead adsorption test was thoroughly cleaned with detergent and DI water.

19 *Pb(II) sequestration test:* To simulate extreme rainfall conditions, each square centimeter of PSC is soaked in rainwater with a volume  
20 of over 9 mL.<sup>1</sup> After soaking the  $1.5 \times 1.5 \text{ cm}^2$  PSC in 20 mL of deionized (DI) water for 3 h, the  $\text{Pb}^{2+}$  concentration was below 20  
21 mg/L. Therefore,  $1.5 \times 1.5 \text{ cm}^2$  PVA and PFPFs with different formulas were soaked in 20 mL of 20 mg/L  $\text{Pb}^{2+}$  solutions prepared by  
22  $\text{PbI}_2$  for 3 h. The  $\text{Pb}^{2+}$  concentrations were measured by ICP-MS and ICP-OES. The pH of the  $\text{Pb}^{2+}$  solutions was measured by a pH  
23 meter.

24 *pH buffer performance test:* To investigate the pH buffering capacity, we continuously added acidic water (pH = 4.2) to 10 ml of DI  
25 water with and without  $1.5 \times 1.5 \text{ cm}^2$  PFPF and recorded the pH evolution.

26 *Pb(II) sorption kinetics test:*  $2.5 \times 2.5 \text{ cm}^2$  PFPF ( $\sim 69.1 \text{ mg}$ ) was added to a beaker containing 56 mL of 20 mg/L  $\text{PbI}_2$  solution and  
27 stirred at room temperature. 0.5 mL of the supernatant was removed at different times (0.05, 0.1, 0.167, 0.5, 3, 5, 10, 30, 60, 90 and  
28 180 min). All supernatants were diluted with DI water and filtered through a  $0.22 \mu\text{m}$  membrane filter. The remaining Pb(II) content  
29 was quantified by ICP-OES and ICP-MS.

30 *Pb(II) sorption isotherm test:* Lead (II) nitrate solutions of different concentrations (10, 30, 60, 120, 300 and  $600 \text{ mg L}^{-1}$ ) were prepared  
31 with DI water  $1.5 \times 1.5 \text{ cm}^2$  PFPF ( $\sim 23.9 \text{ mg}$ ) was added to a volumetric flask containing 5 mL of lead(II) solution of different  
32 concentrations. The mixture was stirred at room temperature for 3 hours. 1 mL of the supernatant was obtained, diluted with deionized  
33 water, filtered through a  $0.22 \mu\text{m}$  membrane, and analyzed by ICP-OES.

#### 34 **Lead leakage tests.**

35 All glassware used in the lead leakage test was cleaned with detergent and deionized water. The encapsulated PSCs and modules were  
36 damaged using a metal ball (45 mm diameter, 360 g) dropped from a height of 5 cm to simulate a heavy hailstorm.<sup>2</sup>

37 *Soak test:* Each damaged cell was placed in a 100 mL beaker containing 36 ml of DI water (For testing of lead leakage of PSM, each  
38 damaged PSM was placed in a 500 mL beaker containing 225 mL of simulated acid rain.) to ensure that the entire cell was completely  
39 submerged. The solution was stirred at room temperature for 3 hours to accelerate the leakage of lead from damaged devices. 0.5 mL  
40 of the supernatant was removed at different times (0.5, 1, 1.5, 2, 2.5 and 3 h). All supernatants were diluted with DI water and filtered  
41 through a  $0.22 \mu\text{m}$  membrane filter. The remaining Pb(II) content was quantified by ICP-OES and ICP-MS.

42 *Drip test:* Each damaged cell was placed in a funnel at a tilt angle of approximately  $30^\circ$ . DI water was continuously dripped into the  
43 cracked area at a rate of 5 mL/h for 3 hours. The lead concentration in the contaminated water was collected using a centrifuge tube at  
44 the bottom of the funnel and then further quantified by ICP-OES and ICP-MS.

45 *Simulated acid rain test:* For the simulated acid rain soak and drip tests, a solution with pH=4.2 (adjusted with HCl and NaOH) was  
46 used instead of DI water. In the ion competition test,  $\text{CaCl}_2$  and  $\text{MgCl}_2$  were added to simulated acid rain at pH=4.2 as above to produce  
47 a solution with  $\text{Ca}^{2+}$  and  $\text{Mg}^{2+}$  concentrations of 10 mg/L.

#### 48 **The Optical Simulation.**

49 As mentioned in the article, the optical simulation is performed using an open-source modelling platform, EYcalc. The optical module  
50 calculates the absorbance of each layer of the given stack, total reflectance and transmittance, combining transfer matrix for thin films  
51 and series expansion of Beer-Lambert for thick optically incoherent layers. We carried out the simulations by building up a database  
52 of the refractive indices of the materials used in our PSC.

#### 53 **Supplementary note.**

54 *Pb(II) sorption kinetics of PFPF:* The adsorption kinetics tests were analyzed by pseudo-first-order and pseudo-second-order models.  
55 The pseudo-first-order kinetic model can be represented as follows:

$$56 \quad q_t = q_e(1 - e^{-K_1 t})$$

1 where  $q_e$  is the adsorption capacity (mg/g) of the adsorbent at equilibrium,  $K_1$  ( $\text{min}^{-1}$ ) is the equilibrium rate constant of the pseudo-first-  
 2 order adsorption. The experimental data plot of the pseudo-first-order kinetic model and which fitting of the kinetic adsorption results  
 3 are shown in Figure 3g.

4 The pseudo-second-order kinetic model can be represented as follows:

$$5 \quad q_t = \frac{tK_2q_e^2}{1 + tKq_e}$$

6 where  $K_2$  ( $\text{g min}^{-1} \text{mg}^{-1}$ ) is the equilibrium rate constant for the pseudo-second-order model. The experimental data plot of the  
 7 pseudosecond-order kinetic model and which fitting of the kinetic adsorption results are shown in Figure S13.

8 The Weber-Morris intra-particle kinetic models have been used to derive the rate-limiting step. The Weber–Morris intra-particle kinetic  
 9 model can be represented as follows:

$$10 \quad q_t = K_{MW}t^{\frac{1}{2}} + C$$

11 where  $K_{MW}$  ( $\text{mg g}^{-1} \text{t}^{-1/2}$ ) is the intra-particle diffusion coefficient, and C is the constant that is associated with the thickness of the  
 12 boundary layer. The experimental data plot of the Weber-Morris intra-particle kinetic models and which fitting of the results are shown  
 13 in Figure S14.

14 *Pb(II) sorption isotherm test of PFPF*: The adsorption isotherm tests were analyzed by Langmuir and Freundlich isothermal adsorption  
 15 models.

16 Langmuir isothermal adsorption model can be represented as follows:

$$17 \quad \frac{C_e}{q_e} = C_e \times \frac{1}{q_{max}} + \frac{1}{K_L q_{max}}$$

18 Where  $q_e$  ( $\text{mg g}^{-1}$ ) is the sorption capacity at equilibrium state,  $C_e$  ( $\text{mg L}^{-1}$ ) is the Pb concentration remaining in the solution at  
 19 equilibrium state and  $K_L$  ( $\text{L mg}^{-1}$ ) is a constant related to binding site affinity. The fitting results are shown in Figure 3h.

20 Freundlich isothermal adsorption model can be represented as follows:

$$21 \quad q_e = K_F C_e^{-n}$$

22 Where  $q_e$  ( $\text{mg g}^{-1}$ ) is the sorption capacity at equilibrium state,  $C_e$  ( $\text{mg L}^{-1}$ ) is the Pb concentration remaining in the solution at  
 23 equilibrium state and  $K_F$  ( $\text{mg/g}$ ) is the Freundlich constant, and n is the adsorption intensity index. The fitting results are shown in  
 24 Figure S15.

25 *The interfacial Fresnel reflection coefficient*: The optical reflection loss at the interface of different media can be expressed by the  
 26 Fresnel equation:

$$27 \quad R = \left( \frac{n_1 - n_0}{n_1 + n_0} \right)^2$$

28 where  $n_0, n_1$  are the corresponding refractive indices of the media beside the interface and R is the interface reflectance.

29

30

## 31 2. Figures

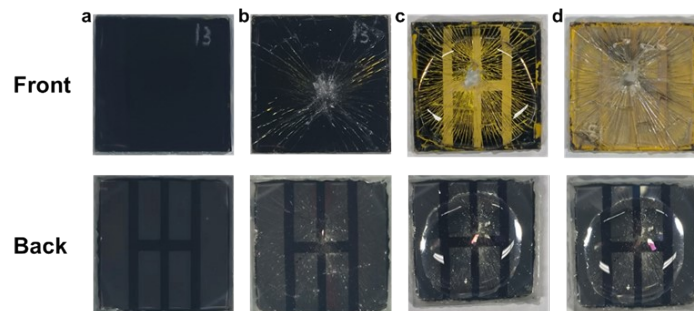

32

33 **Figure S1.** Photographs of encapsulated PSCs after external impacts. Glass (front) and metal (back) side of the  
 34 encapsulated PSC before (a) and after (b) broken by a metal ball, respectively. Star-shaped microcracks appeared  
 35 on the front of the PSC while the glass cover on the back remained intact. Photographs taken 1 minute (c) and  
 36 several hours (d) after dripping deionized water on the front and back of the PSC. The fronts of the PSC turned  
 37 yellow rapidly after dripping water, indicating that the frontal cracks were sufficiently shattered and that the water  
 38 was completely immersed into the PSC within 3 h. On the other hand, the absence of visible phenomenon on the  
 39 back side indicates that the glass cover remains intact after impacts.

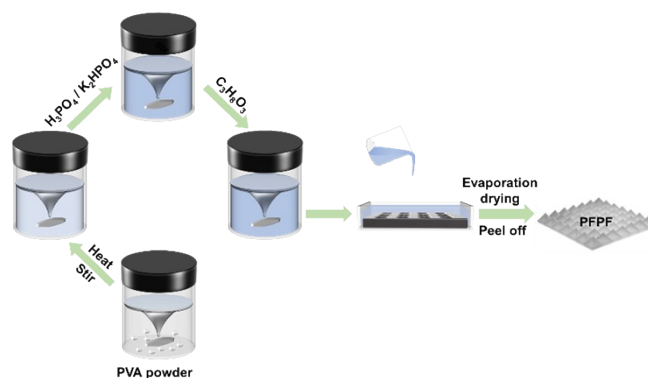

1

2 **Figure S2.** Schematic illustration showing the preparation process of PFPF. The PFPFs were prepared by a simple  
 3 one-pot reaction with polyvinyl alcohol (PVA), phosphoric acid ( $\text{H}_3\text{PO}_4$ ), dipotassium hydrogen phosphate  
 4 ( $\text{K}_2\text{HPO}_4$ ) and glycerol ( $\text{C}_3\text{H}_8\text{O}_3$ ). PVA featuring high optical transmittance, low cost, and dopant-dependent  
 5 thermal and electrical properties was used as the polymer matrix.<sup>3, 4</sup>  $\text{Pb}^{2+}$  sequestration agent (i.e.,  $\text{H}_3\text{PO}_4$  and  
 6  $\text{K}_2\text{HPO}_4$ ), showing pH buffering capability was used to immobilize  $\text{Pb}^{2+}$ .  $\text{C}_3\text{H}_8\text{O}_3$  was used as a plasticizer for  
 7 PVA because of their hydrogen bonding interaction, which enhanced the flexibility and toughness of the polymer  
 8 film.<sup>5-7</sup>

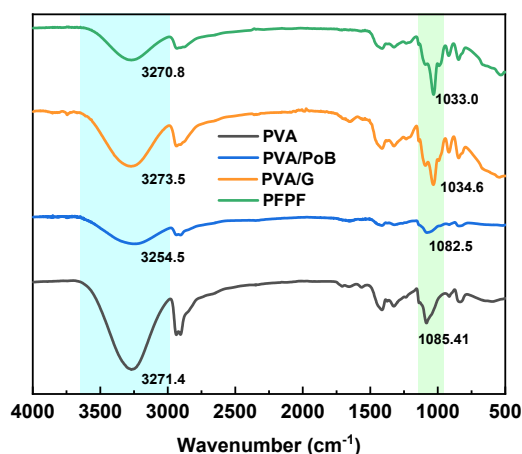

9

10 **Figure S3.** FTIR spectra after adding different additives to PVA. The peaks at 3271.4 and 1085.4  $\text{cm}^{-1}$  are  
 11 attributed to the stretching vibrational peaks of -OH and C-O in PVA. After the addition of  $\text{H}_3\text{PO}_4$  and  $\text{K}_2\text{HPO}_4$   
 12 (i.e., PVA/PoB), both of these peaks are shifted to lower wavenumbers of 3254.5 and 1082.5  $\text{cm}^{-1}$ , respectively.  
 13 This is due to the formation of hydrogen bonding between P-OH and P=O on the phosphate compound and the -  
 14 OH of PVA. When  $\text{C}_3\text{H}_8\text{O}_3$  was added to PVA as a plasticizer (PVA/G), the hydrogen bonds between the molecular  
 15 chains of PVA are weakened, evidenced by the shift of two characteristic peaks to 3273.5 and 1034.6  $\text{cm}^{-1}$ .  
 16 Therefore,  $\text{C}_3\text{H}_8\text{O}_3$  was added to PVA/PoB to improve the mechanical properties. Indeed, the peaks of -OH and  
 17 C-O of PFPF were blue-shifted to 3270.8 and 1033.0  $\text{cm}^{-1}$  compared to PVA.

18

19

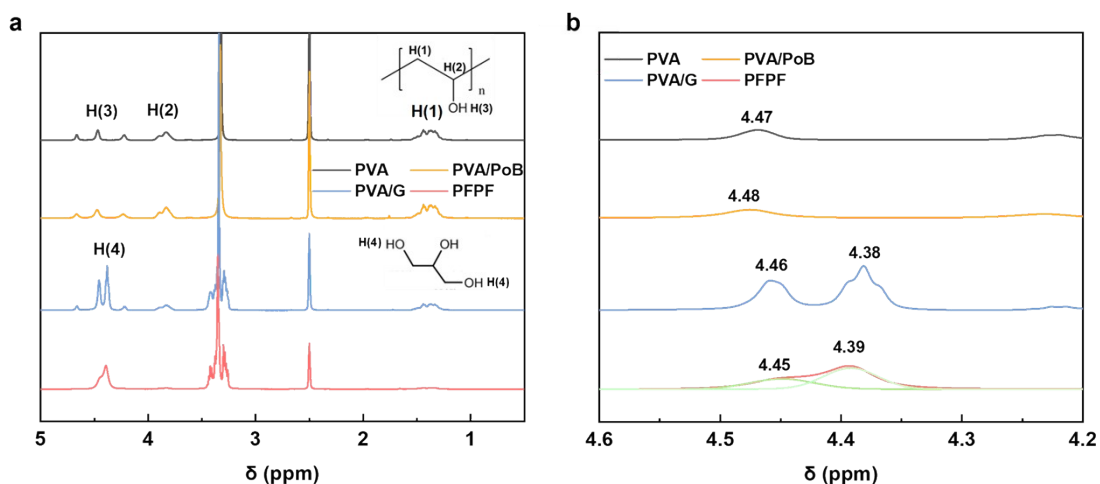

1

2 **Figure S4.**  $^1\text{H-NMR}$  spectra (a) after adding different additives to PVA in  $\text{DMSO-}d_6$  and (b) partial enlargement  
 3 of the spectra. The curves have been corrected for the characteristic peaks of the solvents. Hydrogen bonding  
 4 interactions between the components were demonstrated by shifts in the H(3) and H(4) peaks.

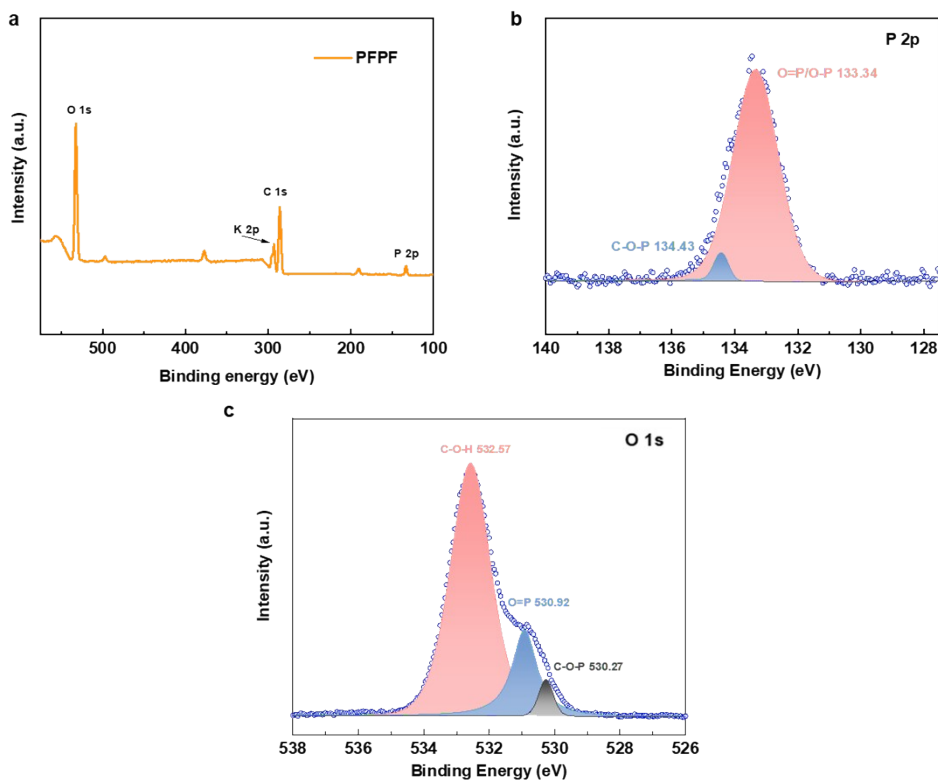

5

6 **Figure S5.** (a) XPS survey spectrum of PFPF. High-resolution XPS spectra of the PFPF for (b) P 2p and (c) O 1s.

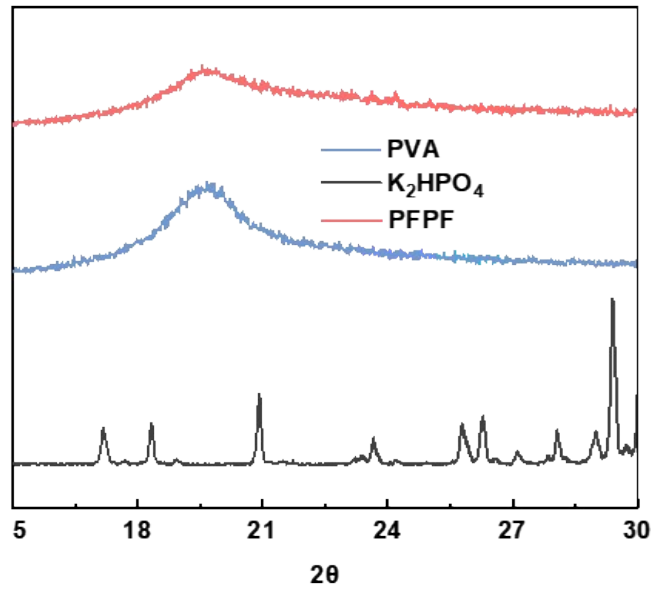

1  
2 **Figure S6.** The chemical structure of the phosphate buffer functionalized polymers.

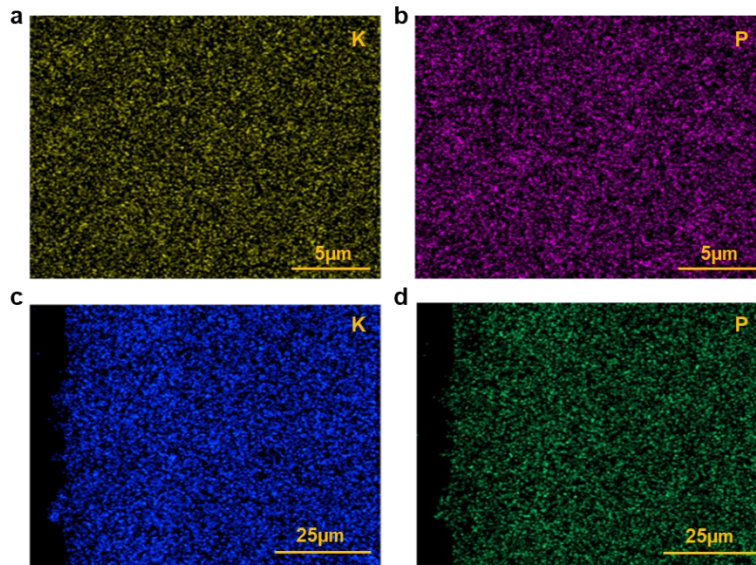

3  
4 **Figure S7.** EDS image of PFPF. EDS images of K element distribution in (a) frontal and (c) cross-sectional  
5 sections of PFPF. EDS images of P element distribution in (b) frontal and (d) cross-sectional sections of PFPF.  
6  $K_2HPO_4$  is uniformly dispersed in PFPF as shown by the uniform distribution of K and P elements in PFPF.

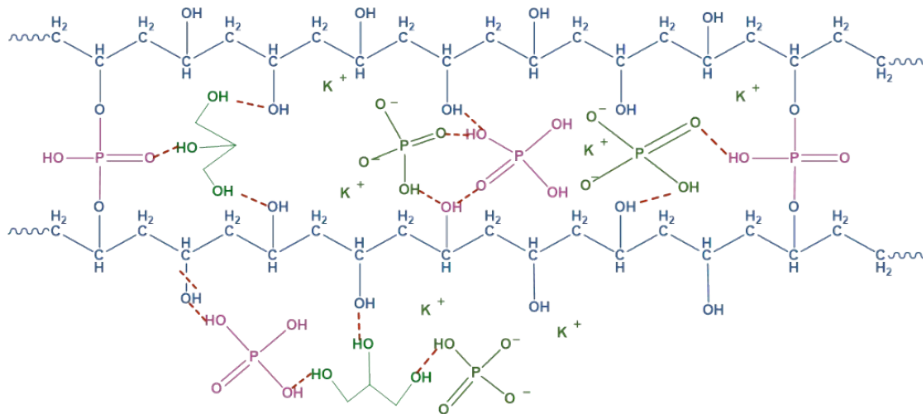

7  
8 **Figure S8.** Molecular structure of PFPF.

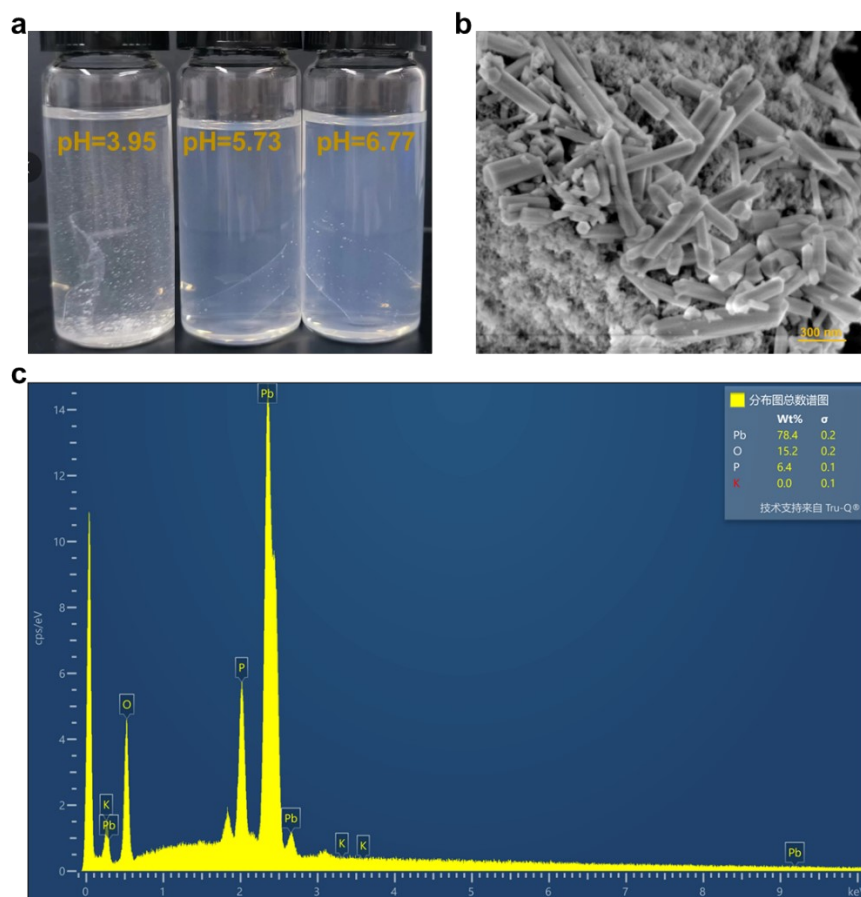

1

2 **Figure S9.** Precipitation morphology and structure. Photographs (a) and SEM image (b) of precipitates produced  
 3 by the reaction of PFPF with  $PbI_2$  solution. When different formulations of PFPF were added to  $PbI_2$ , the solution  
 4 became turbid at an extremely rapid rate. (c) Ratio of elements in precipitation. The weight ratio of each element  
 5 in the precipitate demonstrated by the EDS test is essentially the same as the theoretical weight ratio.

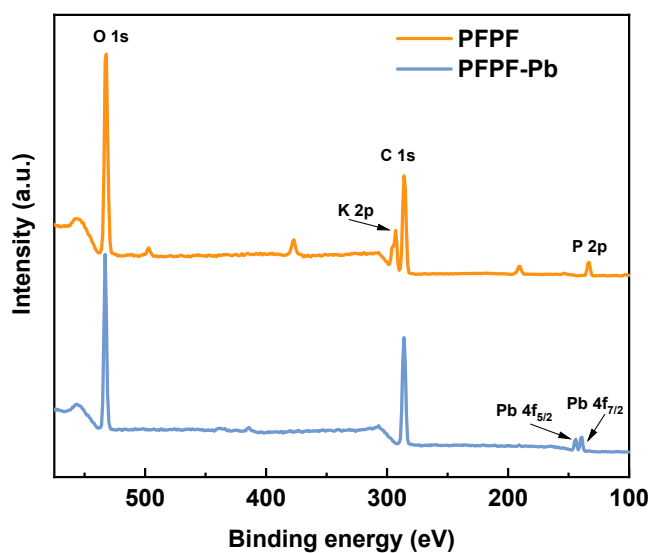

6

7 **Figure S10.** XPS survey spectrum of PFPF and PFPF-Pb.



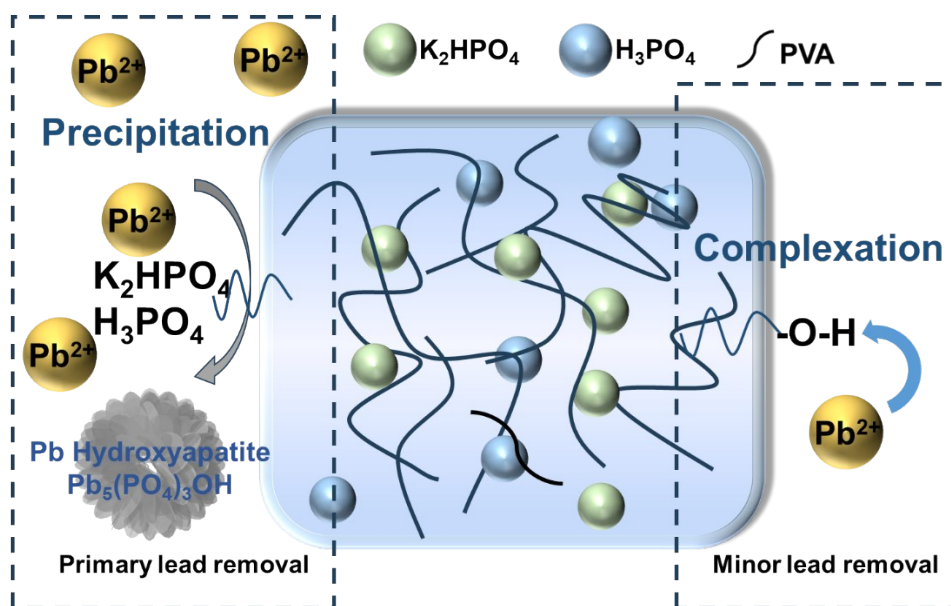

1

2 **Figure S11.** Mechanism of Lead Sequestration of PFPP. PFPP contains multiple hydrogen bonds. A small amount  
 3 of phosphoric acid is esterified with PVA, but breaks under the catalysis of  $Pb^{2+}$ , and then reacts with lead to  
 4 precipitate. PFPP mainly removes lead and lead by forming precipitation with lead, and a small amount of lead is  
 5 removed by forming complexation with PVA.

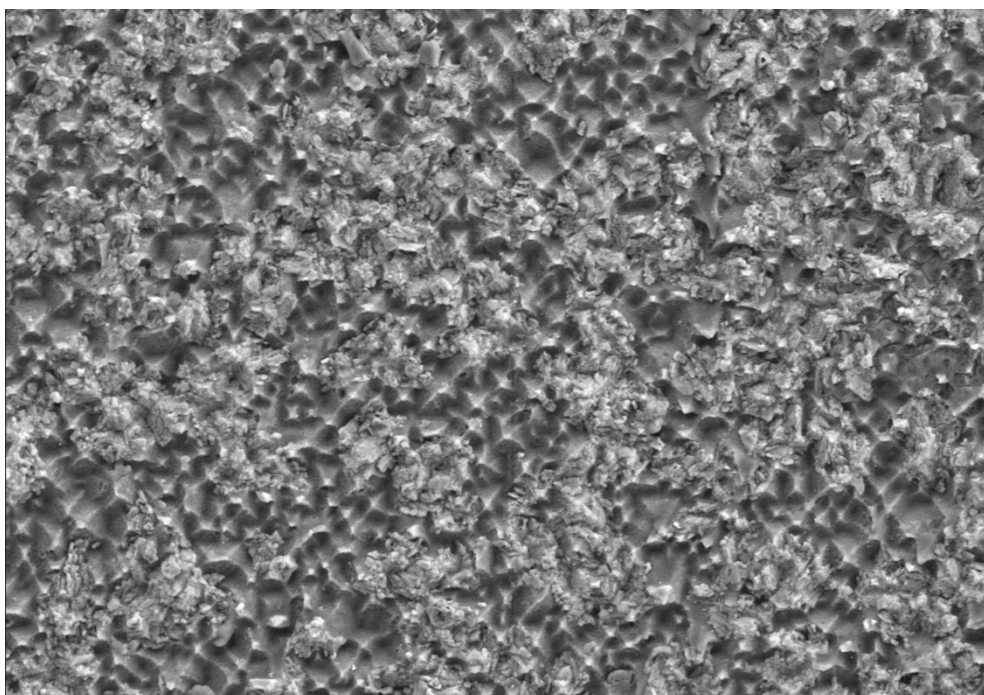

6

7 **Figure S12.** SEM images of  $K_2HPO_4$  when used in excessive amounts in PFPP. White  $K_2HPO_4$  prevents the  
 8 transmission of light.

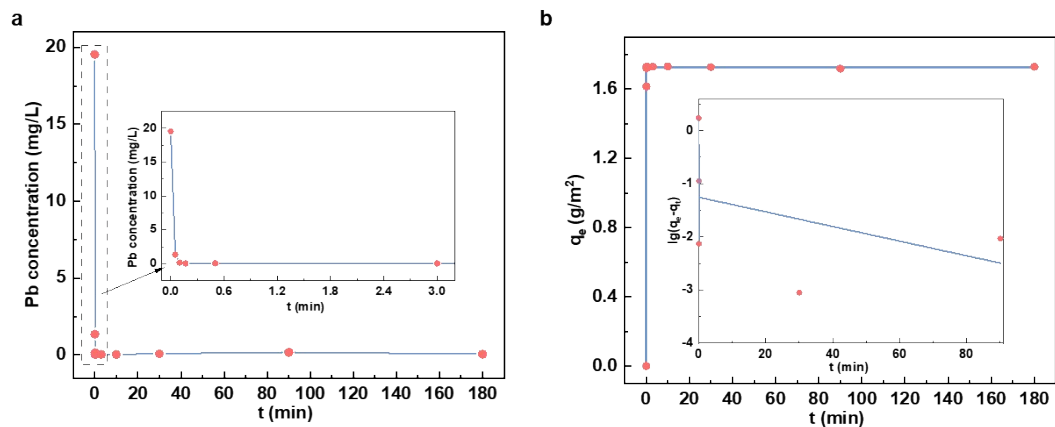

1  
 2 **Figure S13.** Kinetic experiments on PFPF sequestered lead. (a) The curve of lead concentration in solution after  
 3 addition of PFPF. (b) The kinetics fitting curve of the PFPF from a pseudo-first-order mode ( $R^2=0.144$ ).  
 4

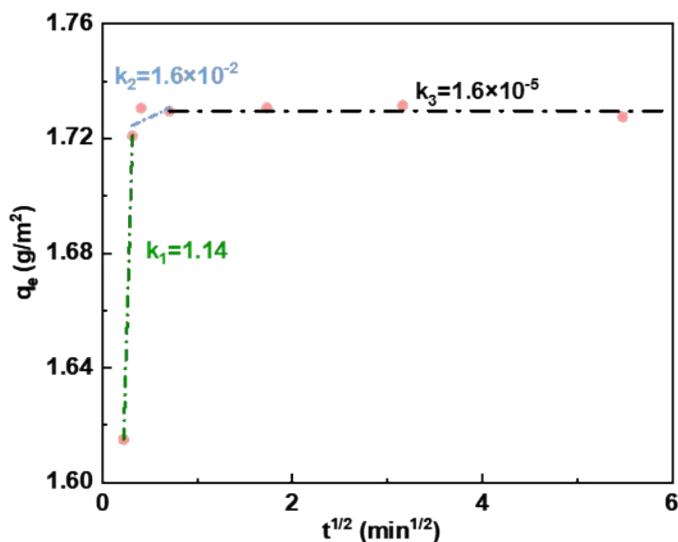

5  
 6 **Figure S14.** The  $Pb^{2+}$  absorption of the PFPF fitted using Weber-Morris kinetic models.

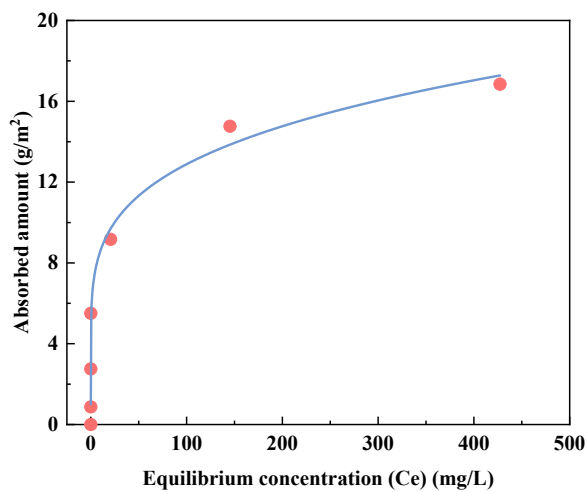

7  
 8 **Figure S15.** The kinetics fitting curve of the PFPF from a Freundlich isothermal adsorption model ( $R^2=0.905$ ).

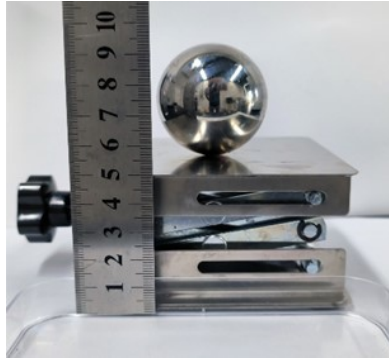

1

2 **Figure S16.** Photograph of the metal ball impact perovskite solar cell to simulate hail impact.

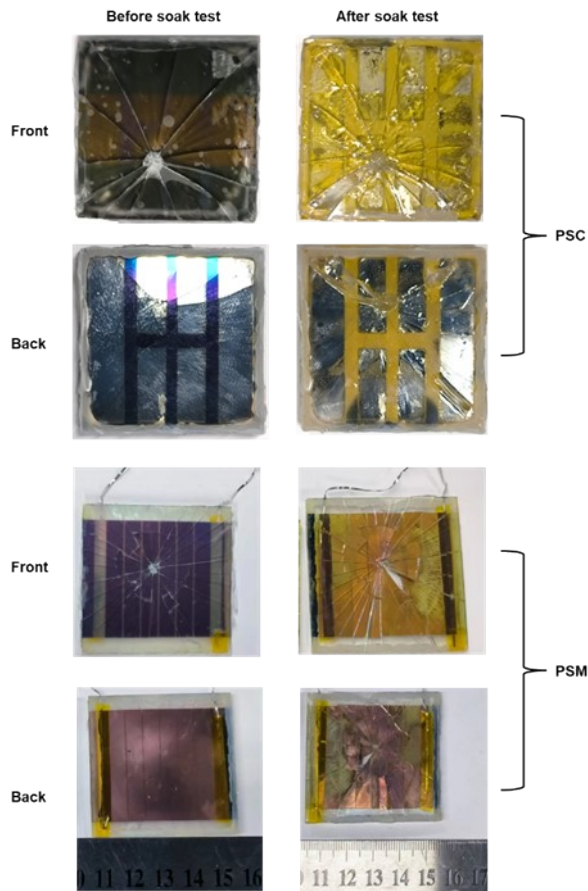

3

4 **Figure S17.** Photographs showing the damaged PSC and PSM before and after water soaking test. After the  
 5 water soak test, the black perovskite layer changed to yellow or transparent, indicating that the PSC was fully  
 6 submerged in water and the lead ions had leaked significantly.

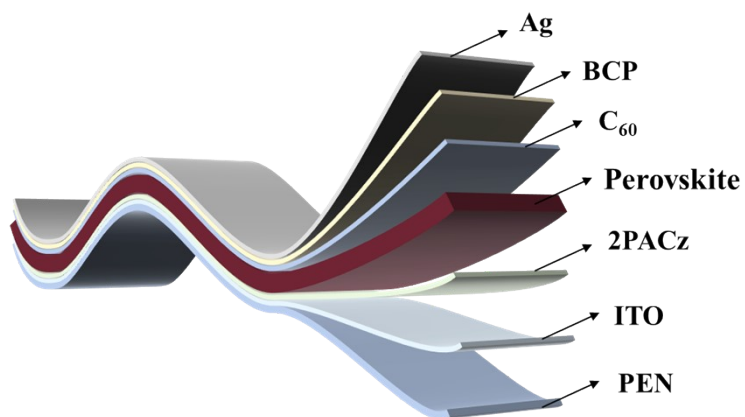

1  
2 **Figure S18.** Schematic structure of flexible PSCs.  
3

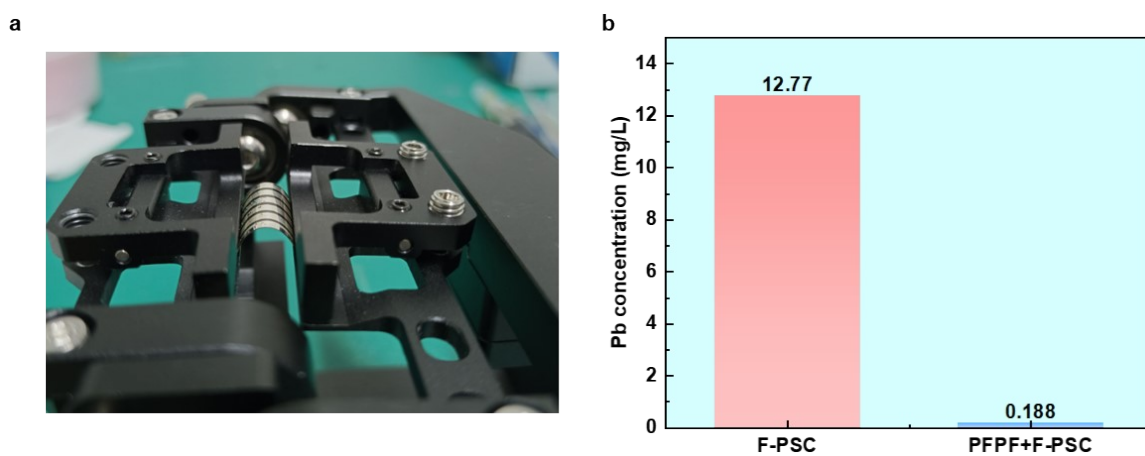

4  
5 **Figure S19.** (a) Photographs of bent flexible PSC. (b) Water soaking test results for the damaged encapsulated F-  
6 PSC without and with the PFPF after blending.  
7

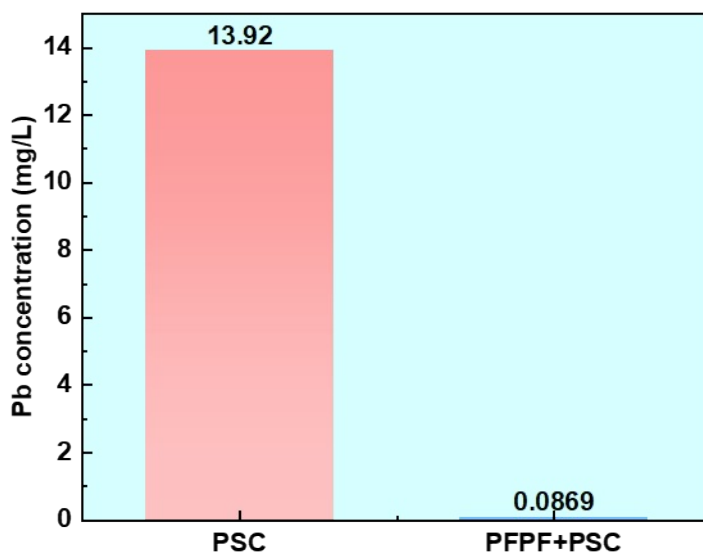

8  
9 **Figure S20.** Water soaking test results for the damaged encapsulated PSCs without and with the PFPF at 85°C.  
10

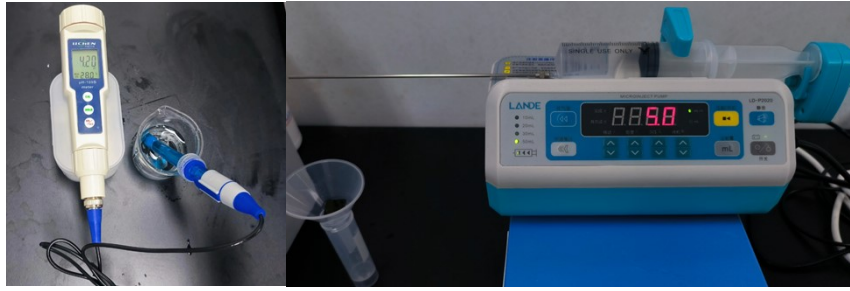

1

2 **Figure S21.** Photographs of acid water with a pH value of 4.2 dripped on the damaged PSCs for 3h with adripping  
 3 rate of 5 mL h<sup>-1</sup> to simulate weather condition of acid rain after hail impact on PSCs.

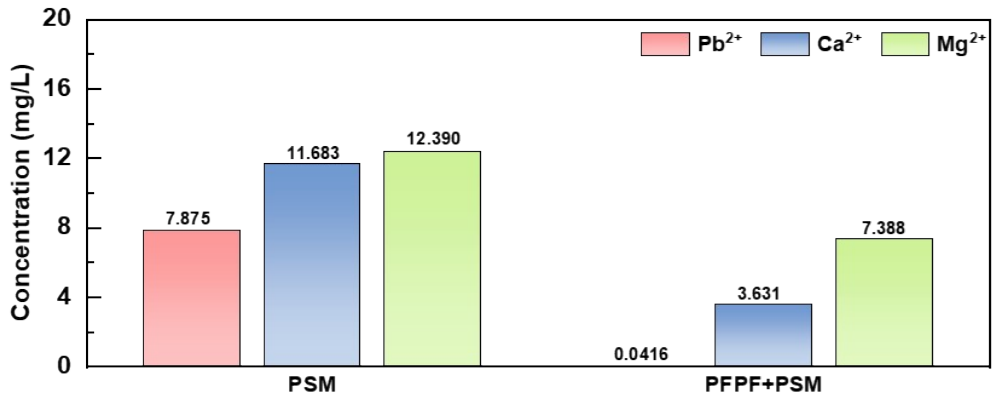

4

5 **Figure S22.** Simulation of the effectiveness of PFPF in preventing lead leakage from PSM in acidic and ionic  
 6 competition environment.

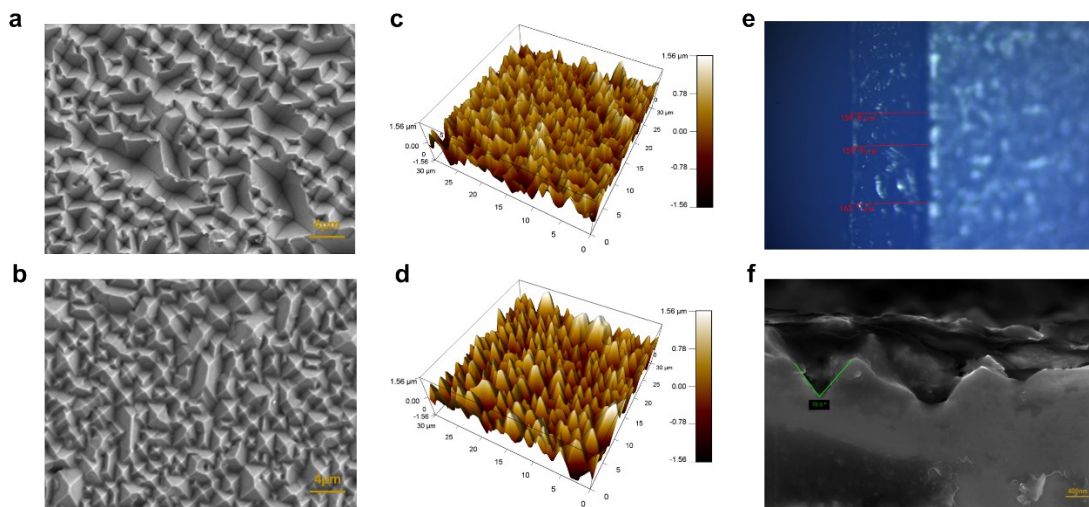

7

8 **Figure S23.** Microscopic image of PFPF. SEM (a, b) and AFM (c, d) images of template wafers and PFPF. The  
 9 positive pyramidal mechanism of the PFPF surface and its roughness, which is similar to that of the template  
 10 wafer, indicate the successful replication of the surface morphology of the template wafer. (e) Film thickness of  
 11 PFPF. (f) The angle of the top corner of the pyramid.

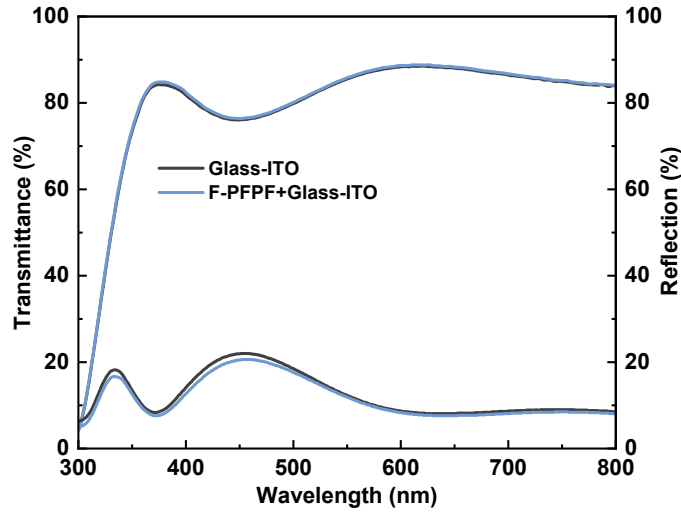

1

2 **Figure S24.** Transmission and reflection of the ITO glass substrate with and without F-PFPF.

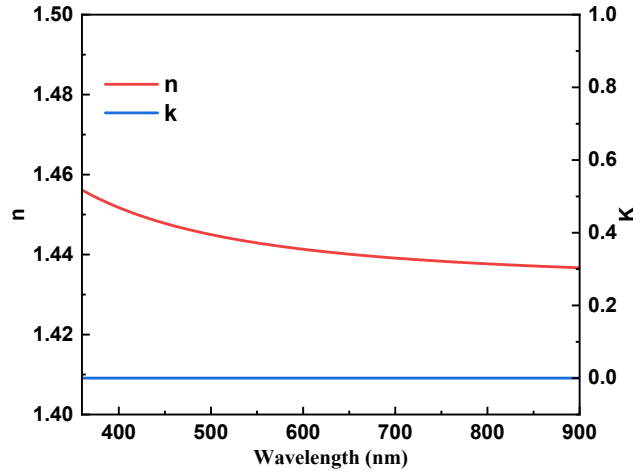

3

4 **Figure S25.** Refractive index (n) and extinction coefficient (k) of the PFPF.

5 In addition, we further calculated the light transition efficiency (LTE) of devices without and with PFPF. The LTE  
 6 of theoretical light transmission efficiency is calculated by the Fresnel equation (*Advanced Energy Materials*,  
 7 2022, 12(33): 2201520).

$$8 \quad LTE = \frac{4n_t n_i}{(n_t + n_i)^2}$$

9 where  $n_i$  is the refractive index of the incident material of light, and  $n_t$  is the refractive index of the transmitting  
 10 material of light. As a result, the LTE of PFPF is higher (96.75%) than glass (95.61%) due to the lower refractive  
 11 index ( $n_{air}=1$ ,  $n_{PFPF}=1.44$ ,  $n_{glass}=1.53$ ). This results in an improvement in PCE of PSCs.

12

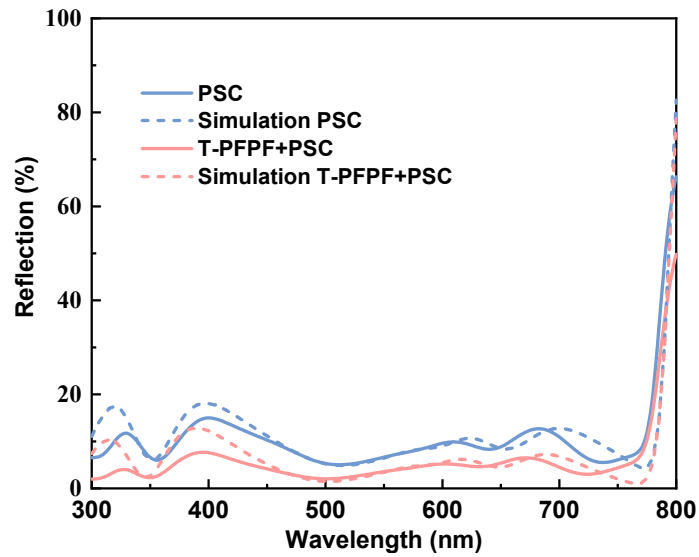

1

2 **Figure S26.** The experiment and emulation reflection of PSC with and without PFPF.

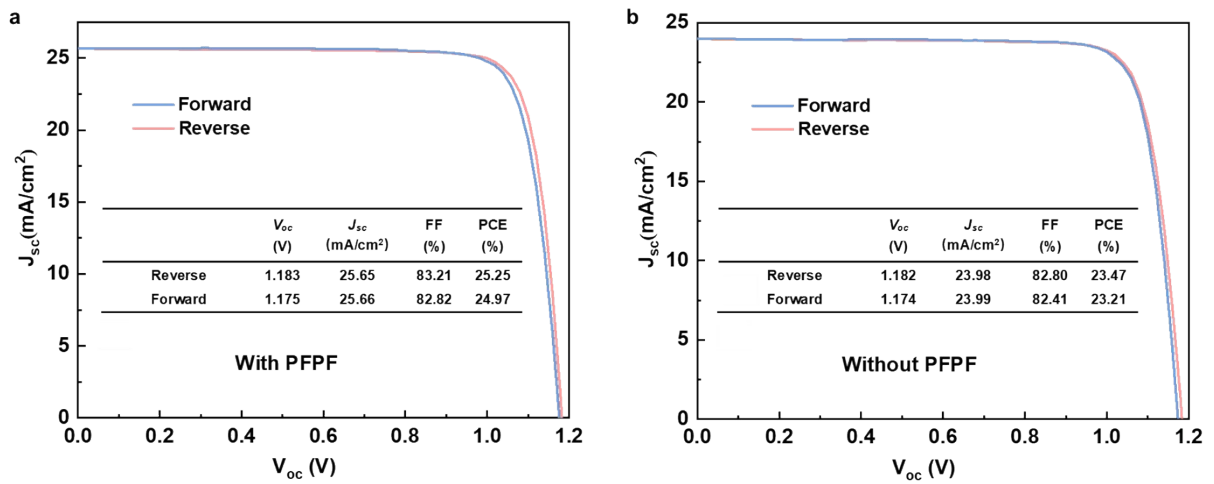

3

4 **Figure S27.** J–V curves and photovoltaic parameters of the champion rigid PSC with and without PFPF under  
5 different scan directions.

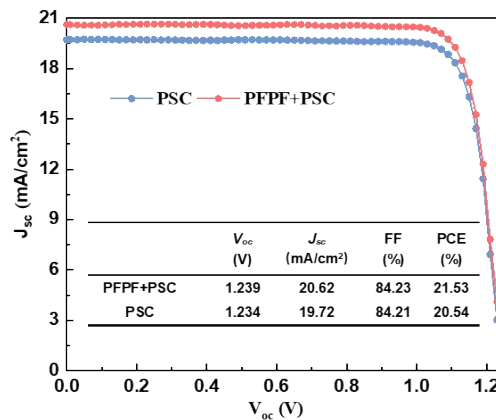

6

7 **Figure S28.** J–V curves and photovoltaic parameters of the wide bandgap PSCs with and without PFPF.

8

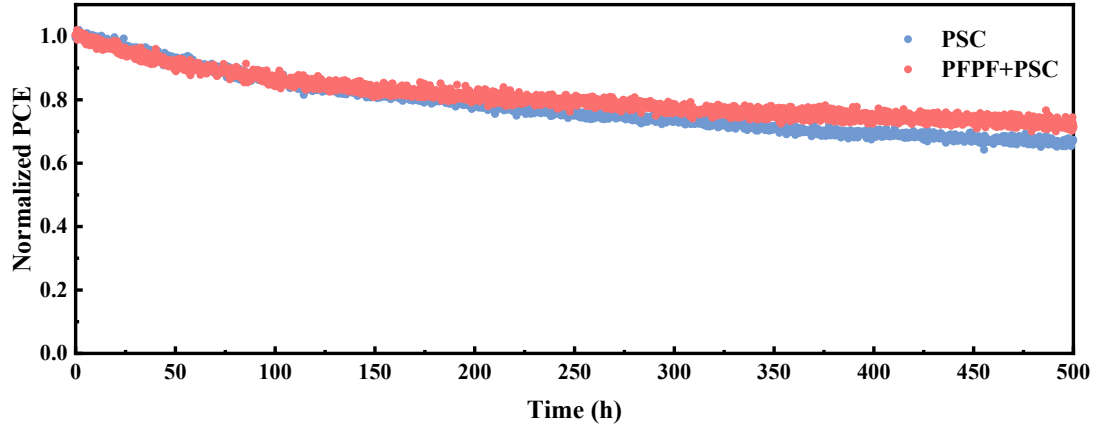

1

2 **Figure S29.** Normalized efficiency of the PSCs without and with the PFPF performed at MPP.

3

4

### 5 3. Tables

6 **Table S1.** The estimated equilibrium time and the maximum adsorbing capacity of the reported Pb-absorbing  
7 materials and the PFPF.

| Pb <sup>2+</sup> sequestration materials | estimated equilibrium time (min) | maximum adsorbing capacity (g m <sup>-2</sup> ) | Reference |
|------------------------------------------|----------------------------------|-------------------------------------------------|-----------|
| CNT-PAA                                  | 5                                | NA                                              | 8         |
| POM@MOF                                  | 5                                | NA                                              | 9         |
| POMOF                                    | 5                                | NA                                              | 10        |
| CER                                      | 20                               | NA                                              | 11        |
| CER                                      | 20                               | NA                                              | 12        |
| Ionogel                                  | 20                               | 27.14g/m <sup>2</sup>                           | 13        |
| S-GA                                     | 30                               | NA                                              | 14        |
| DMDP                                     | 30                               | 1.28 g/m <sup>2</sup>                           | 15        |
| ZrL <sub>3</sub> :bis-C <sub>60</sub>    | 30                               | NA                                              | 16        |
| PPVI-TFSI                                | 30                               | NA                                              | 17        |
| HDA-HBPs                                 | 30                               | NA                                              | 18        |
| CPD                                      | 260                              | 0.828 g/m <sup>2</sup>                          | 19        |
| HOF-FJU-1                                | 400                              | NA                                              | 20        |
| TiO <sub>2</sub> sponge                  | 480                              | 0.63 g/m <sup>2</sup>                           | 1         |
| <b>PFPF</b>                              | <b>0.167</b>                     | <b>17.205 g/m<sup>2</sup></b>                   |           |

8

9 **Table S2.** Statistical photovoltaic parameters of PSCs with and without PFPF.

|            | $V_{oc}$ (V) | $J_{sc}$ (mA/cm <sup>2</sup> ) | FF (%)     | PCE (%)    |
|------------|--------------|--------------------------------|------------|------------|
| PFPF+PSC   | 1.172±0.007  | 25.58±0.12                     | 81.30±1.45 | 24.38±0.56 |
| PSC        | 1.171±0.006  | 24.02±0.31                     | 80.97±1.06 | 22.77±0.48 |
| PFPF+F-PSC | 1.112±0.003  | 24.26±0.09                     | 82.24±0.36 | 22.20±0.04 |
| F-PSC      | 1.110±0.004  | 22.71±0.07                     | 81.48±0.48 | 20.54±0.14 |

10 A total of 10 samples (5 PSCs with PFPF and 5 PSCs without PFPF) were considered for statistical analysis.

11

12 **Table S3.** Comparison of the other Pb-absorbing materials.



| Materials used in previous reports | Materials cost (\$/g)    | Reference |
|------------------------------------|--------------------------|-----------|
| Self-healing resin                 | 342                      | 2         |
| DMDP                               | 16500                    | 15        |
| EDTMP                              | 0.625                    |           |
| CERs                               | 0.24                     | 11        |
| S-GA/PDMS                          | 0.133                    | 14        |
| CPD                                | 0.048                    | 19        |
| PFPF                               | <b>0.019 (This work)</b> |           |

1  
2  
3  
4  
5  
6  
7  
8  
9  
10

#### 11 4. References

- 12 1. S. Valastro, E. Smecca, G. Mannino, C. Bongiorno, G. Fisicaro, S. Goedecker, V. Arena,  
13 C. Spampinato, I. Deretzis, S. Dattilo, A. Scamporrino, S. Carroccio, E. Fazio, F. Neri,  
14 F. Bisconti, A. Rizzo, C. Spinella, A. La Magna and A. Alberti, *Nat. Sustain*, 2023, **6**,  
15 974-983.
- 16 2. Y. Jiang, L. Qiu, E. J. Juarez-Perez, L. K. Ono, Z. Hu, Z. Liu, Z. Wu, L. Meng, Q. Wang  
17 and Y. Qi, *Nat. Energy*, 2019, **4**, 585-593.
- 18 3. C. U. Devi, A. K. Sharma and V. V. R. N. Rao, *Mater. Lett.*, 2002, **56**, 167-174.
- 19 4. H. E. Ali, I. Morad, H. Algarni, M. M. El-Desoky, Y. Khairy, H. Y. Zahran and I. S.  
20 Yahia, *J. Mater. Sci.: Mater. Electron.*, 2021, **32**, 4466-4479.
- 21 5. O. Hu, G. Chen, J. Gu, J. Lu, J. Zhang, X. Zhang, L. Hou and X. Jiang, *Int. J. Biol.*  
22 *Macromol.*, 2020, **164**, 2512-2523.
- 23 6. C. Hu, Y. Zhang, X. Wang, L. Xing, L. Shi and R. Ran, *ACS Appl. Mater. Interfaces*,  
24 2018, **10**, 44000-44010.
- 25 7. H. Chen, X. Ren and G. Gao, *ACS Appl. Mater. Interfaces*, 2019, **11**, 28336-28344.
- 26 8. J. Wang, R. Zhang, H. Xu, Y. Chen, H. Zhang and N.-G. Park, *ACS Energy Lett.*, 2022,  
27 **7**, 1577-1585.
- 28 9. Y. Dong, J. Zhang, Y. Yang, J. Wang, B. Hu, W. Wang, W. Cao, S. Gai, D. Xia, K. Lin  
29 and R. Fan, *Nano Energy*, 2022, **97**, 107184.
- 30 10. Y. Dong, J. Zhang, W. Wang, B. Hu, D. Xia, K. Lin, L. Geng and Y. Yang, *Small*, 2023,  
31 **19**, 2301824.
- 32 11. Z. Li, X. Wu, S. Wu, D. Gao, H. Dong, F. Huang, X. Hu, A. K. Y. Jen and Z. Zhu, *Nano*  
33 *Energy*, 2022, **93**, 106853.
- 34 12. S. Chen, Y. Deng, H. Gu, S. Xu, S. Wang, Z. Yu, V. Blum and J. Huang, *Nat. Energy*,  
35 2020, **5**, 1003-1011.
- 36 13. X. Xiao, M. Wang, S. Chen, Y. Zhang, H. Gu, Y. Deng, G. Yang, C. Fei, B. Chen and Y.  
37 Lin, *Sci. Adv.*, 2021, **7**, eabi8249.
- 38 14. Z. Li, X. Wu, B. Li, S. Zhang, D. Gao, Y. Liu, X. Li, N. Zhang, X. Hu, C. Zhi, A. K. Y.  
39 Jen and Z. Zhu, *Adv. Energy Mater.*, 2022, **12**, 2103236.
- 40 15. X. Li, F. Zhang, H. He, J. J. Berry, K. Zhu and T. Xu, *Nature*, 2020, **578**, 555-558.
- 41 16. S. Wu, Z. Li, M.-Q. Li, Y. Diao, F. Lin, T. Liu, J. Zhang, P. Tieu, W. Gao, F. Qi, X. Pan,  
42 Z. Xu, Z. Zhu and A. K. Y. Jen, *Nat. Nanotechnol.*, 2020, **15**, 934-940.

- 1 17. H. Chen, G.-H. Zhang, Q.-H. Zhu, J. Fu, S. Qin, L. He and G.-H. Tao, *ACS Appl. Mater.*  
2 *Interfaces*, 2023, **15**, 13637-13643.
- 3 18. Z. Li, C. Jia, Z. Wan, J. Xue, J. Cao, M. Zhang, C. Li, J. Shen, C. Zhang and Z. Li, *Nat.*  
4 *Commun.*, 2023, **14**, 6451.
- 5 19. Y. Xiong, H. Cai, W. Yue, W. Shen, X. Zhu, J. Zhao, F. Huang, Y.-B. Cheng and J.  
6 Zhong, *J. Energy Chem.*, 2023, **84**, 311-320.
- 7 20. J. Zhang, C. Li, M. Zhu, J. Qiu, Y. Yang, L. Li, S. Tang, Z. Li, Z. Mao, Z. Cheng, S.  
8 Xiang, X. Zhang and Z. Zhang, *Nano Energy*, 2023, **108**, 108217.
- 9
